# Supplementary material for: Closed-form stochastic solutions for non-equilibrium dynamics and inheritance of cellular components over many cell divisions
Source: PubMed Central journal article supplement (PMC4550007; doi:10.1098/rspa.2015.0050), 2015-08-08
Supplement: rspa20150050supp1.pdf [file rspa20150050supp1.pdf]

## Appendix

In this Appendix we present some of the lengthier mathematical results used in the main text. We include a Mathematica notebook as part of this article, containing the following derivations.

### Generating function for the BID process

The derivation of the generating function for BID dynamics in the absence of cell divisions is well known: we include it here for completeness. We write the PDE describing the generating function  $G(z, t)$  in Laplace form:

$$\frac{\partial G(z, t)}{\partial t} - (\nu(1 - z) + \lambda(z^2 - z)) \frac{\partial G(z, t)}{\partial z} = \alpha(z - 1)G \quad (1)$$

$$G(z, 0) = z^{m_0}, \quad (2)$$

$$(3)$$

We proceed by using the method of characteristics, writing down ODEs describing how the parameters of  $G$ , and  $G$  itself, changes along a characteristic curve, with progress along such a curve parameterised by  $s$ . The corresponding ODEs are

$$\frac{dt}{ds} = 1 \quad (4)$$

$$\frac{dz}{ds} = -(\nu(1 - z) + \lambda(z^2 - z)) \quad (5)$$

$$\frac{dG}{ds} = \alpha(z - 1)G \quad (6)$$

Eqn. 4 lets us immediately set  $t = s$ , omitting a constant of integration as the absolute value of progress along a characteristic curve is unimportant. Using  $t = s$  throughout, Eqn. 5 is solved by

$$z = \frac{1 - \nu e^{c_1(\lambda - \nu) - t(\lambda - \nu)}}{1 - \lambda e^{c_1(\lambda - \nu) - t(\lambda - \nu)}} \quad (7)$$

where  $c_1$  is a constant of integration, the explicit form of which will be useful later. Rearranging this into an expression for  $c_1$  gives

$$c_1 = t + \frac{\ln\left(\frac{z-1}{\lambda z - \nu}\right)}{\lambda - \nu}. \quad (8)$$

Finally, Eqn. 6 with Eqn. 7 gives us

$$G = c_2 e^{-\alpha t} \left( e^{\lambda t + c_1 \nu} - \lambda e^{\lambda c_1 + \nu t} \right)^{\alpha/\lambda}. \quad (9)$$

$c_2$  is a function of  $c_1$  because the quantity  $c_1$ , the constant of integration acquired when integrating  $z$  with respect to  $s$ , is independent of  $s$ , and hence forms an independent parameter when integrating  $G$  with respect to  $s$ . We require that  $G(t = 0) = z^{m_0}$ , so we choose

$$c_2(c_1) = \left( e^{c_1 \nu} - \lambda e^{c_1 \lambda} \right)^{-\alpha/\lambda} \left( \frac{\nu e^{(\lambda - \nu)c_1} - 1}{\lambda e^{(\lambda - \nu)c_1} - 1} \right)^{m_0}, \quad (10)$$

where the first term cancels the final term in Eqn. 9 when  $t = 0$ , and the final term can be seen to extract a factor  $z^{m_0}$  from Eqn. 8 for  $c_1$  when  $t = 0$ . We then have

$$G(z, t) = c_2(c_1(z, t)) e^{-\alpha t} \left( e^{\lambda t + c_1(z, t)\nu} - \lambda e^{\lambda c_1(z, t) + \nu t} \right)^{\alpha/\lambda} \quad (11)$$

which, after inserting Eqn. 8 and some algebra, gives

$$G(z, t) = \left( \frac{\nu - \lambda}{\lambda e^{(\lambda-\nu)t}(z-1) - \lambda z + \nu} \right)^{\frac{\alpha}{\lambda}} \left( \frac{\nu e^{(\lambda-\nu)t}(z-1) - \lambda z + \nu}{\lambda e^{(\lambda-\nu)t}(z-1) - \lambda z + \nu} \right)^{m_0} \quad (12)$$

$$\equiv \xi(z, t)(g(z, t))^{m_0} \quad (13)$$

### Recurrence relations arising from induction over cell divisions

This section focusses on the solution of recurrence relations of the form

$$\zeta_i = \frac{a\zeta_{i+1} + b}{c\zeta_{i+1} + d}, \text{ or equivalently, } \zeta_{i+1} = \frac{d\zeta_i - b}{-c\zeta_i + a} \quad (14)$$

In the Main Text, both  $h_i$  and  $z_i$  follow relationships of this kind; we use the symbol  $\zeta_i$  here to emphasise that the same solution strategy applies in both cases, and describe specific solutions below. This system is solved, after [1], by defining  $\alpha \equiv \frac{a+d}{c}$ ,  $\beta \equiv \frac{D}{c^2}$ ,  $D \equiv ad - bc$ ,  $y_i = \zeta_i + \frac{d}{c}$  and implicitly defining  $w_i$  through  $y_i = \frac{w_i}{w_{i+1}}$ . These changes of variables allow us to find an expression for  $w_i$ , which can then be substituted back through the above chain to find  $\zeta_i$ . We have

$$y_i = \alpha - \frac{\beta}{y_{i+1}} \quad (15)$$

$$\frac{w_i}{w_{i+1}} = \alpha - \frac{\beta w_{i+2}}{w_{i+1}} \quad (16)$$

$$\rightarrow \beta w_{i+2} - \alpha w_{i+1} + w_i = 0, \quad (17)$$

which is solved by considering solutions to the characteristic equation  $\beta k^2 - \alpha k + 1 = 0$ , which are straightforwardly  $k_{1,2} = \frac{1}{2\beta}(\alpha \pm \sqrt{\alpha^2 - 4\beta})$ . Then

$$w_i = C_1 k_1^i + C_2 k_2^i \quad (18)$$

$$y_i = \frac{C_0 k_1^i + k_2^i}{C_0 k_1^{i+1} + k_2^{i+1}} \quad (19)$$

$$\zeta_i = \frac{C_0 k_1^i + k_2^i}{C_0 k_1^{i+1} + k_2^{i+1}} - \frac{d}{c} \quad (20)$$

where  $C_i$  are constants to be determined from boundary conditions. If the boundary condition takes the form  $\zeta_n = \frac{pz+q}{rz+s}$ , as is the case throughout the situations we consider, we obtain

$$\frac{C_0 k_1^i + k_2^i}{C_0 k_1^{i+1} + k_2^{i+1}} - \frac{d}{c} = \frac{pz+q}{rz+s} \quad (21)$$

$$\Rightarrow C_0 = \frac{k_2^n k_1^{-n} (k_2 c(pz+q) + k_2 d(rz+s) - c(rz+s))}{c(rz+s) - k_1 c(pz+q) - k_1 d(rz+s)}. \quad (22)$$

Thus, given knowledge of  $a, b, c, d$  from the recurrence relation and  $p, q, r, s$  from the initial condition, we can obtain  $k_1, k_2$  through  $\alpha$  and  $\beta$  and hence use Eqns. 22 and 20 to obtain a solution to the recurrence relation. Below, we use this approach to obtain solutions for the systems of interest in the main text.

### Binomial partitioning solution for $h$

We will use the substitutions  $l = e^{(\lambda-\nu)\tau}$ ,  $l' = e^{(\lambda-\nu)t}$ . The original recurrence relation is

$$h_i = g\left(\frac{1}{2} + \frac{h_{i+1}}{2}, \tau\right) \quad (23)$$

$$= \frac{(\nu l - \lambda)h_{i+1} + (-\lambda - \nu(l-2))}{(\lambda(l-1))h_{i+1} + (2\nu - \lambda(l+1))} \quad (24)$$

$$h_n = g(z, t) \quad (25)$$

$$= \frac{(\nu l' - \lambda)z + (\nu - \nu l')}{(\lambda(l' - 1))z + (\nu - \lambda l')} \quad (26)$$

hence,  $a = (\nu l - \lambda)$ ,  $b = (2\nu - \nu l - \lambda)$ ,  $c = (\lambda l - \lambda)$ ,  $d = (2\nu - \lambda - \lambda l)$ ,  $p = (\nu l' - \lambda)$ ,  $q = (\nu - \nu l')$ ,  $r = (\lambda(l' - 1))$ ,  $s = (\nu - \lambda l')$ . Using these values to determine  $\alpha, k_1, k_2$ , and after some algebra, we obtain

$$h_i = \frac{2^i l^n l' (z-1)(\lambda + \nu(l-2)) + 2^n l^i (\lambda(l' - z(l+l' - 2)) + \nu(l-2))}{2^i l^n l' \lambda(l-1)(z-1) + 2^n l^i (\lambda(l' - z(l+l' - 2)) + \nu(l-2))}. \quad (27)$$

### Subtractive partitioning solution for $h$

$$h_i = g(h_{i+1}, \tau) \quad (28)$$

$$= \frac{(\nu l - \lambda)h_{i+1} + (\nu - \nu l)}{(\lambda(l-1))h_{i+1} + (\nu - \lambda l)}; \quad (29)$$

$$h_n = g(z, t), \quad (30)$$

$$= \frac{(\nu l' - \lambda)z + (\nu - \nu l')}{(\lambda(l' - 1))z + (\nu - \lambda l')} \quad (31)$$

hence  $a = (\nu l - \lambda)$ ,  $b = (\nu - \nu l)$ ,  $c = (\lambda(l-1))$ ,  $d = (\nu - \lambda l)$ ,  $p = (\nu l' - \lambda)$ ,  $q = (\nu - \nu l')$ ,  $r = \lambda(l' - 1)$ ,  $s = (\nu - \lambda l')$ . Then

$$h_i = \frac{l^n l' \nu (z-1) + l^i (\nu - \lambda z)}{l^n l' \lambda (z-1) + l^i (\nu - \lambda z)} \quad (32)$$

### Binomial partitioning solution for $z$

$$z_i = \frac{1}{2} + \frac{g(z_{i-1}, \tau)}{2} \quad (33)$$

$$= \frac{(l(\lambda + \nu) - 2\lambda)z_{i-1} + (2\nu - l(\lambda + \nu))}{(2\lambda(l-1))z_{i-1} + (2\nu - 2\lambda l)} \quad (34)$$

$$\Rightarrow z_i = \frac{(2\nu - 2\lambda l)z_{i+1} + (l(\lambda + \nu) - 2\nu)}{(2\lambda(1-l))z_{i+1} + (l(\lambda + \nu) - 2\lambda)} \quad (35)$$

$$z_1 = \frac{1}{2} + \frac{g(z, t)}{2}. \quad (36)$$

$$= \frac{(l'(\lambda + \nu) - 2\lambda)z + (2\nu - l'(\lambda + \nu))}{(2\lambda(l' - 1))z + (2\nu - 2\lambda l')} \quad (37)$$

In Eqn. 35 we have used the equivalence in Eqn. 14 to rewrite the recurrence relation in the form we have previously solved. Subsequently,  $a = (2\nu - 2\lambda l)$ ,  $b = (l(\lambda + \nu) - 2\nu)$ ,  $c = (2\lambda(1-l))$ ,  $d = (l(\lambda + \nu) - 2\lambda)$ ,  $p = (l'(\lambda + \nu) - 2\lambda)$ ,  $q = (2\nu - l'(\lambda + \nu))$ ,  $r = (2\lambda(l' - 1))$ ,  $s = (2\nu - 2\lambda l')$ , leading to

$$z_i = \frac{l^i l' (z-1)(l(\lambda + \nu) - 2\nu) - 2^i l (\lambda l' (z-1) + (l-2)(\lambda z - \nu))}{2\lambda l^i l' (z-1)(l-1) - 2^i l (\lambda l' (z-1) + (l-2)(\lambda z - \nu))} \quad (38)$$

### Subtractive partitioning solution for $z$

$$z_i = g(z_{i-1}, \tau), \quad (39)$$

$$= \frac{(\nu l - \lambda)z_{i-1} + (\nu - \nu l)}{(\lambda(l-1)z_{i-1} + (\nu - \lambda l))}; \quad (40)$$

$$\Rightarrow z_i = \frac{(\nu - \lambda l)z_{i+1} + (\nu l - \nu)}{(\lambda(1-l)z + (\nu l - \lambda))} \quad (41)$$

$$z_1 = g(z, t), \quad (42)$$

$$= \frac{(\nu l' - \lambda)z + (\nu - \nu l')}{(\lambda(l' - 1)z + (\nu - \lambda l'))}; \quad (43)$$

Hence  $a = (\nu - \lambda l)$ ,  $b = (\nu l - \nu)$ ,  $c = (\lambda(1 - l))$ ,  $d = (\nu l - \lambda)$ ,  $p = (\nu l' - \lambda)$ ,  $q = (\nu - \nu l')$ ,  $r = \lambda(l' - 1)$ ,  $s = (\nu - \lambda l')$ , leading to

$$z_i = \frac{l^i l' \nu (z - 1) + l(\nu - \lambda z)}{l^i l' \lambda (z - 1) + l(\nu - \lambda z)} \quad (44)$$

### Products of prefactors over the inductive process

We are concerned with an expression for the product  $\prod_{i=1}^n \phi(z_i, \tau)$  from the Main Text. We first consider  $\prod_{i=1}^n \xi(z_i, \tau)$  which occurs as a factor in this expression in every partitioning regime. We recall that  $\xi(z, t)$  has the form

$$\xi(z, t) = \left( \frac{\nu - \lambda}{\lambda e^{(\lambda - \nu)t} (z - 1) - \lambda z + \nu} \right)^{\alpha/\lambda} \quad (45)$$

If we write  $z_i$  in the form

$$z_i = \frac{\tilde{A}_1 \rho_A^i + \tilde{B}_1 \rho_B^i}{\tilde{A}_2 \rho_A^i + \tilde{B}_2 \rho_B^i}, \quad (46)$$

a general form separating variables raised to the power  $i$  in  $z_i$  (here represented by  $\rho$ ), from their coefficients  $\tilde{A}_j, \tilde{B}_j$ , the form of Eqn. 45 gives us:

$$\xi(z_i, \tau) = \left( \frac{A_1 \rho_A^i + B_1 \rho_B^i}{A_2 \rho_A^i + B_2 \rho_B^i} \right)^\gamma, \quad (47)$$

where  $A_1 = (\tilde{A}_2(\nu - \lambda))$ ,  $B_1 = (\tilde{B}_2(\nu - \lambda))$ ,  $A_2 = (\lambda(\tilde{A}_1 - \tilde{A}_2) + \nu\tilde{A}_2 - \lambda\tilde{A}_1)$ ,  $B_2 = (\lambda(\tilde{B}_1 - \tilde{B}_2) + \nu\tilde{B}_2 - \lambda\tilde{B}_1)$ ,  $\gamma = \alpha/\lambda$ , following from the form of  $\xi(z, t)$ .

The product of an expression of this form can be written

$$\prod_{i=1}^n \xi(z_i, t_i) \equiv \prod_{i=1}^n \left( \frac{A_1 \rho_A^i + B_1 \rho_B^i}{A_2 \rho_A^i + B_2 \rho_B^i} \right)^\gamma = \left( B_1^n \rho_B^{n(n+1)/2} \prod_{i=1}^n \left( 1 + \frac{A_1 \rho_A^i}{B_1 \rho_B^i} \right) \right)^\gamma \left( B_2^n \rho_B^{n(n+1)/2} \prod_{i=1}^n \left( 1 + \frac{A_2 \rho_A^i}{B_2 \rho_B^i} \right) \right)^{-\gamma} \quad (48)$$

Here we make use of the  $q$ -Pochhammer symbol  $(a; q)_n$ , defined by

$$(a; q)_n \equiv \prod_{k=0}^{n-1} (1 - aq^k). \quad (49)$$

The terms within the brackets on the RHS of Eqn. 48 then become, by setting  $a = -A_j/B_j$  and  $q = \rho_A/\rho_B$ ,

$$B_j^n \rho_B^{n(n+1)/2} \prod_{i=1}^n \left( 1 + \frac{A_j \rho_A^i}{B_j \rho_B^i} \right) \equiv B_j^n \rho_B^{n(n+1)/2} \frac{1}{1 + A_j/B_j} (-A_j/B_j; \rho_A/\rho_B)_{n+1}, \quad (50)$$

$$= B_j^{n+1} \rho_B^{n(n+1)/2} \frac{(-A_j/B_j; \rho_A/\rho_B)_{n+1}}{A_j + B_j} \quad (51)$$

and so

$$\left( B_1^n \rho_B^{n(n+1)/2} \prod_{i=1}^n \left( 1 + \frac{A_1 \rho_A}{B_1 \rho_B} \right) \right)^\gamma \left( B_2^n \rho_B^{n(n+1)/2} \prod_{i=1}^n \left( 1 + \frac{A_2 \rho_A}{B_2 \rho_B} \right) \right)^{-\gamma} \equiv \left( \frac{B_1^{n+1} B_2^{-n-1} (A_2 + B_2) (-A_1/B_1; \rho_A/\rho_B)_{n+1}}{(A_1 + B_1) (-A_2/B_2; \rho_A/\rho_B)_{n+1}} \right)^\gamma, \quad (52)$$

yielding a simple form for the product of interest. For the binomial case, we have from Eqn. 38:

$$z_i = \frac{l^i l' (z-1) (l(\lambda + \nu) - 2\nu) - 2^i l (\lambda l' (z-1) + (l-2)(\lambda z - \nu))}{2\lambda l^i l' (z-1) (l-1) - 2^i l (\lambda l' (z-1) + (l-2)(\lambda z - \nu))}. \quad (53)$$

Here, the two quantities raised to the power of  $i$  in  $z_i$  are  $l$  and  $2$ , so we set  $\rho_A \equiv l$ ,  $\rho_b \equiv 2$ . Then by comparing coefficients we identify  $\tilde{A}_1 = (l'(z-1)(l(\lambda+\nu)-2\nu))$ ,  $\tilde{B}_1 = (-l(\lambda l'(z-1) + (l-2)(\lambda z - \nu)))$ ,  $\tilde{A}_2 = (2\lambda l'(z-1)(l-1))$ ,  $\tilde{B}_2 = (-l(\lambda l'(z-1) + (l-2)(\lambda z - \nu)))$ , hence  $A_1 = 2\lambda l'(l-1)(z-1)(\nu - \lambda)$ ,  $A_2 = \lambda l'(l-1)(z-1)(\nu - \lambda)$ ,  $B_1 = B_2 = -l(\lambda l'(z-1) + (l-2)(\lambda z - \nu))(\nu - \lambda)$ , and finally  $\gamma = \alpha/\lambda$ .

For the subtractive case, we have from Eqn. 44:

$$z_i = \frac{l^i l' \nu (z-1) + l(\nu - \lambda z)}{l^i l' \lambda (z-1) + l(\nu - \lambda z)}. \quad (54)$$

Now the quantities raised to the power of  $i$  are  $l$  and  $1$ , so we set  $\rho_A = l$ ,  $\rho_B = 1$ , and find  $\tilde{A}_1 = (l'\nu(z-1))$ ,  $\tilde{B}_1 = (l(\nu - \lambda z))$ ,  $\tilde{A}_2 = (l'\lambda(z-1))$ ,  $\tilde{B}_2 = (l(\nu - \lambda z))$ , hence  $A_1 = \lambda l'(z-1)(\nu - \lambda)$ ,  $A_2 = \lambda l'(z-1)(\nu - \lambda)$ ,  $B_1 = B_2 = l(\nu - \lambda)(\nu - \lambda z)$ , and  $\gamma = \alpha/\lambda$ .

### Other products

We can also use this result to compute the product of exponentiated prefactors involved in the subtractive inheritance regimes. We will first consider the product  $\prod_{i=1}^n g(z_i, \tau)^{-\eta}$ , which plays a role in the deterministic subtractive inheritance we consider later. We recall the definitions of the recurrence relations in the Main Text

$$h_i(z, t) = g(\theta(h_{i+1}), \tau); h_n(z, t) = g(z, t) \quad (55)$$

$$z_{i+1} = \theta(g(z_i, \tau)); z_1 = \theta(g(z, t)). \quad (56)$$

For both subtractive inheritance cases,  $\theta(g(z, t)) = g(z, t)$ , so it can straightforwardly be seen that

$$z_{i+1} = g(z_i, \tau); z_1 = g(z, t) \quad (57)$$

$$h_i(z, t) = g(h_{i+1}, \tau); h_n(z, t) = g(z, t) \quad (58)$$

$$\text{and so } h_n(z, t) = z_1; h_{n-i+1} = z_i. \quad (59)$$

Thus, the product  $\prod_{i=1}^n g(z_i, \tau)^{-\eta}$  is equivalent to the product  $\prod_{j=1}^n h_j^{-\eta}$ , where  $j = n - i + 1$ . As  $i$  and  $j$  are dummy variables, we can then identify the required solution as  $\prod_{i=1}^n h_i^{-\eta}$ . We have from Eqn. 32 that

$$h_i = \frac{l^n l' \nu (z-1) + l^i (\nu - \lambda z)}{l^n l' \lambda (z-1) + l^i (\nu - \lambda z)} \quad (60)$$

$$= \frac{\nu l' x_1^i (-x_2)^n (z-1) + x_1^n (-x_2)^i (\nu - \lambda z)}{\lambda l' x_1^i (-x_2)^n (z-1) + x_1^n (-x_2)^i (\nu - \lambda z)} \quad (61)$$

where we have rewritten the final line to avoid a diverging factor of  $(z-1)^{-1}$  appearing in the Pochhammer symbol, using

$$x_1 = \frac{\lambda}{\lambda - \nu} (e^{(\nu - \lambda)\tau} - 1) \quad (62)$$

$$x_2 = \frac{\lambda}{\lambda - \nu} (e^{(\lambda - \nu)\tau} - 1) \quad (63)$$

We then see that  $h_i^{-\eta}$  is of the form Eqn. 47, so we can use the result therein, with  $A_1 = \nu l'(-x_2)^n(z-1)$ ,  $B_1 = B_2 = x_1^n(\nu - \lambda z)$ ,  $A_2 = \lambda l'(-x_2)^n(z-1)$ ,  $\rho_A = x_1$ ,  $\rho_B = (-x_2)$ ,  $\gamma = -\eta$ .

Next, we wish to compute an expression for  $\prod_{i=1}^n \left( \frac{1}{2} + \frac{1}{2g(z_i, t)} \right)^{2\eta}$ , of use in the random subtractive regime. We again exploit the relation between  $g(z_i, \tau)$  and  $h_j$  in Eqn. 59 to show that the kernel of the desired product is equivalent to  $\left( \frac{1}{2} + \frac{1}{2h_i} \right)$ . Again, we use  $h_i$  from Eqn. 32; after some algebra this expression reduces to

$$\frac{l' x_1^i (-x_2)^n (z-1)(\lambda + \nu) + 2x_1^n (-x_2)^i (\nu - \lambda z)}{2l' x_1^i (-x_2)^n \nu (z-1) + 2x_1^n (-x_2)^i (\nu - \lambda z)}, \quad (64)$$

whereupon we can use Eqn. 52 with  $A_1 = l'(-x_2)^n(z-1)(\lambda + \nu)$ ,  $B_1 = B_2 = 2x_1^n(\nu - \lambda z)$ ,  $A_2 = 2l'(-x_2)^n \nu (z-1)$ ,  $\rho_A = x_1$ ,  $\rho_B = (-x_2)$ ,  $\gamma = 2\eta$ .

### Full forms of generating functions

To recap, we use  $\alpha, \lambda, \nu$  to respectively represent the rates of immigration, birth, and death in our model;  $m_0$  for initial copy number;  $\tau$  for cell cycle length,  $n$  for the number of divisions that have occurred, and  $t$  for the elapsed time since the most recent cell division. We employ simplifying symbols  $l \equiv e^{(\lambda - \nu)\tau}$ ;  $l' \equiv e^{(\lambda - \nu)t}$  and  $x_1 \equiv \lambda(l^{-1} - 1)/(\lambda - \nu)$ ;  $x_2 \equiv \lambda(l - 1)/(\lambda - \nu)$ .

The general form of the generating functions was shown in the Main Text to be

$$G_n(z, t) = \underbrace{\left( \prod_{i=1}^n \xi(z_i, \tau) \right)}_{(i)} \underbrace{\left( \prod_{i=1}^n \phi(z_i, \tau) \right)}_{(ii)} \underbrace{\xi(z, t)}_{(iii)} \underbrace{h_0(z, t)^{m_0}}_{(iv)}, \quad (65)$$

where  $z_i$  and  $h_i$  are the solutions to recursion relations defined in the Main Text. The term (iii) is the same in all calculations and is, from Eqn. 12,

$$\xi(z, t) = \left( \frac{\nu - \lambda}{\lambda l(z-1) - \lambda z + \nu} \right)^{\alpha/\lambda}. \quad (66)$$

The generating function in the case of binomial partitioning at cell divisions involves (i) Eqn. 52 applied to the appropriate terms described in Eqn. 53; (ii) unity; (iii) Eqn. 66; and (iv)  $h_0$  from Eqn. 27, giving overall

$$\begin{aligned} G_n(z, t) = & \left( \frac{(\lambda l l' (l-1)(z-1) - l(\lambda l'(z-1) + (l-2)(\lambda z - \nu))) \left( \frac{-2\lambda l'(l-1)(z-1)}{-l(\lambda l'(z-1) + (l-2)(\lambda z - \nu))}; \frac{l}{2} \right)_{n+1}}{(2\lambda l l' (l-1)(z-1) - l(\lambda l'(z-1) + (l-2)(\lambda z - \nu))) \left( \frac{-\lambda l l'(l-1)(z-1)}{-l(\lambda l'(z-1) + (l-2)(\lambda z - \nu))}; \frac{l}{2} \right)_{n+1}} \right)^{\alpha/\lambda} \\ & \times \left( \frac{\nu - \lambda}{\lambda l(z-1) - \lambda z + \nu} \right)^{\alpha/\lambda} \\ & \times \left( \frac{l^n l'(z-1)(\lambda + \nu(l-2)) + 2^n(\lambda(l' - z(l+l' - 2)) + \nu(l-2))}{l^n l'(z-1)\lambda(l-1) + 2^n(\lambda(l' - z(l+l' - 2)) + \nu(l-2))} \right)^{m_0} \end{aligned} \quad (67)$$

The generating function in the case of random subtractive inheritance involves (i) Eqn. 52 applied to the appropriate terms described in Eqn. 54; (ii) Eqn. 52 applied to Eqn. 64 as described; (iii) Eqn. 66; and (iv)  $h_0$  from Eqn. 32, and is

$$\begin{aligned}
G_n(z, t) = & \left( \frac{(2l'\nu(-x_2)^n(z-1) - 2x_1^n(\lambda z - \nu)) \left( \frac{-l'(\lambda+\nu)(-x_2)^n(z-1)}{-2x_1^n(\lambda z - \nu)}; \frac{x_1}{-x_2} \right)_{n+1}}{(l'(\lambda + \nu)(-x_2)^n(z-1) - 2x_1^n(\lambda z - \nu)) \left( \frac{2l'\nu(-x_2)^n(z-1)}{-2x_1^n(\lambda z - \nu)}; \frac{x_1}{-x_2} \right)_{n+1}} \right)^{2n} \\
& \times \left( \frac{(\lambda l'l(z-1) + l(\nu - \lambda z)) \left( \frac{-\lambda l'(z-1)}{l(\nu - \lambda z)}; l \right)_{n+1}}{(\lambda l'(z-1) + l(\nu - \lambda z)) \left( \frac{-\lambda l'(z-1)}{l(\nu - \lambda z)}; l \right)_{n+1}} \right)^{\alpha/\lambda} \\
& \times \left( \frac{\nu - \lambda}{\lambda l(z-1) - \lambda z + \nu} \right)^{\alpha/\lambda} \left( \frac{l^n l' \nu(z-1) + \nu - \lambda z}{l^n l' \lambda(z-1) + \nu - \lambda z} \right)^{m_0}
\end{aligned} \tag{68}$$

### Birth-death dynamics for the mtDNA bottleneck

For birth-death dynamics,  $\alpha = 0$ , so for binomial partitioning the generating function takes the form of the final term in Eqn. 67.

In the case of balanced copy number, with  $\lambda = \ln 2/\tau + \nu$ ,

$$g(z, t) = \frac{(2^{t/\tau} - 1)(z-1)\nu\tau - z \ln 2}{2^{t/\tau}(z-1)(\nu\tau + \ln 2) - z \ln 2 - \nu\tau(z-1)} \tag{69}$$

The corresponding solutions for  $z_i, h_i$  are

$$z_i = \frac{2^{t/\tau}(z-1)((i+1)\nu\tau + i \ln 2) - 2(z-1)\nu\tau - z \ln 4}{2^{t/\tau}(z-1)(i+1)(\nu\tau + \ln 2) - 2(z-1)\nu\tau - z \ln 4} \tag{70}$$

$$h_i = \frac{2^{t/\tau}(z-1)((i-n-2)\nu\tau + (i-n) \ln 2) + 2\nu\tau(z-1) + z \ln 4}{2^{t/\tau}(z-1)(i-n-2)(\nu\tau + \ln 2) + 2\nu\tau(z-1) + z \ln 4} \tag{71}$$

so

$$G_n(z, t) = \underbrace{1}_{(i)} \times \underbrace{1}_{(ii)} \times \underbrace{1}_{(iii)} \times \underbrace{\left( \frac{2\nu\tau(z-1) - 2^{t/\tau}(z-1)((n+2)\nu\tau + n \ln 2) + z \ln 4}{2\nu\tau(z-1) - 2^{t/\tau}(z-1)(n+2)(\nu\tau + \ln 2) + z \ln 4} \right)^{m_0}}_{(iv)}. \tag{72}$$

### Relaxed replication of mtDNA dynamics

The generating function for a single cell cycle (involving immigration and death dynamics) can straightforwardly be found

$$G(z, t) = \exp((1 - e^{-\beta t})m_{opt}(z-1)) (1 + e^{-\beta t}(z-1))^{m_0}, \tag{73}$$

and so

$$\xi(z, t) \equiv \exp((1 - e^{-\beta t})m_{opt}(z-1)) \tag{74}$$

$$g(z, t) \equiv 1 + e^{-\beta t}(z-1). \tag{75}$$

For binomial partitioning, we have  $\phi(z, t) = 1$  and  $\theta(g(z, t)) = (1/2 + g(z, t)/2)$ . The solutions of the appropriate recurrence relations are then:

$$z_i = 1 + 2^{-i} e^{-\beta(t+(i-1)\tau)} (z-1) \quad (76)$$

$$h_i = 1 + 2^{i-n} e^{-\beta(t+(n-i)\tau)} (z-1) \quad (77)$$

So the overall generating function is

$$G_n(z, t) = \underbrace{\exp\left(m_{opt}(z-1) \left(\frac{2^{-n} e^{-\beta t} (e^{\beta\tau} - 1)(2^n - e^{-\beta n\tau})}{2e^{\beta\tau} - 1}\right)\right)}_{(i)} \times \underbrace{1}_{(ii)} \times \underbrace{\exp\left((1 - e^{-\beta t})m_{opt}(z-1)\right)}_{(iii)} \times \underbrace{\left(1 + 2^{-n} e^{-\beta(t+n\tau)} (z-1)\right)^{m_0}}_{(iv)}, \quad (78)$$

which after some simplification can be written as

$$G(z, t) = e^{az+b}(cz+d)^{m_0}, \quad (79)$$

with

$$a = m_{opt} \left(1 - e^{-\beta t} + \frac{2^{-n} e^{-\beta t} (e^{\beta\tau} - 1)(2^n - e^{-\beta n\tau})}{2e^{\beta\tau} - 1}\right); \quad (80)$$

$$b = -a; \quad (81)$$

$$c = 2^{-n} e^{-\beta(t+n\tau)}; \quad (82)$$

$$d = 1 - c. \quad (83)$$

In particular, the mean copy number is  $(ae^{az+b}(cz+d)^{m_0} + e^{az+b}m_0c(cz+d)^{m_0-1})_{z=1}$ , giving

$$\mathbb{E}(m, t) = 2^{-n} e^{-\beta(t+n\tau)} m_0 + m_{opt} \left(1 - e^{-\beta t} + \frac{2^{-n} e^{-\beta t} (e^{\beta\tau} - 1)(2^n - e^{-\beta n\tau})}{2e^{\beta\tau} - 1}\right) \quad (84)$$

and setting  $t = \tau$  (at the end of a cell cycle), we obtain

$$\mathbb{E}(m, \tau) - m_{opt} = \frac{1 + 2^{-n} (e^{-\beta n\tau} - e^{-\beta(n+1)\tau})}{2e^{\beta\tau} - 1} m_{opt} - 2^{-n} e^{-\beta\tau(n+1)} m_0. \quad (85)$$

The  $n \rightarrow \infty$  limit of this expression is

$$\mathbb{E}(m, \tau) - m_{opt} \xrightarrow{n \rightarrow \infty} \frac{1}{2e^{\beta\tau} - 1} m_{opt}. \quad (86)$$

In this  $n \rightarrow \infty$  limit the generating function reduces to

$$G(z, t) \xrightarrow{n \rightarrow \infty} \exp\left(m_{opt}(z-1) \left(1 - e^{-\beta t} + \frac{e^{-\beta t} (e^{-\beta t} - 1)}{2e^{\beta\tau} - 1}\right)\right), \quad (87)$$

so that

$$P(m, t) \xrightarrow{n \rightarrow \infty} \frac{1}{m!} \left(\frac{m_{opt}(1 - 2e^{\beta\tau} + e^{-\beta(t-\tau)})}{1 - 2e^{\beta\tau}}\right)^m \exp\left(\frac{-m_{opt}(1 - 2e^{\beta\tau} + e^{-\beta(t-\tau)})}{1 - 2e^{\beta\tau}}\right). \quad (88)$$

Using Eqn. 79 and Leibniz's rule, the general probability distribution function is given by



$$P(m, t) = \frac{1}{m!} \left. \frac{\partial^m G}{\partial z^m} \right|_{z=0} \quad (89)$$

$$= \frac{1}{m!} \sum_{k=0}^m \binom{m}{k} a^{m-k} e^{az+b} \frac{m_0!}{(m_0-k)!} (cz+d)^{m_0-k} \Big|_{z=0} \quad (90)$$

$$= \frac{e^{az+b} (-c)^m (cz+d)^{m_0-m}}{m!} U \left( -m, 1-m+m_0, \frac{-a(cz+d)}{c} \right) \Big|_{z=0}, \quad (91)$$

$$= (1/m!) (-c)^m d^{m_0-m} e^b U(-m, 1-m+m_0, -ad/c) \quad (92)$$

where  $U(a, b, z)$  is the confluent hypergeometric function.

For subtractive partitioning, we have  $\phi(z, t) = (1/2 + 1/(2g(z, t)))^{2\eta}$  and  $\theta(g(z, t)) = g(z, t)$ . The solutions of the appropriate recurrence relations are then:

$$z_i = 1 + e^{-\beta(t+(i-1)\tau)} (z-1) \quad (93)$$

$$h_i = 1 + e^{-\beta(t+(n-i)\tau)} (z-1) \quad (94)$$

So the overall generating function is

$$\begin{aligned} G_n(z, t) = & \underbrace{\exp\left(m_{opt}(z-1)\left(e^{-\beta t} - e^{-\beta(t+n\tau)}\right)\right)}_{(i)} \underbrace{4^\eta \left( \frac{(z-1 + e^{\beta(t+n\tau)}) \left(\frac{-1}{2} e^{-\beta(t+n\tau)}(z-1); e^{\beta\tau}\right)_{n+1}}{(z-1 + 2e^{\beta(t+n\tau)}) \left(-e^{-\beta(t+n\tau)}(z-1); e^{\beta\tau}\right)_{n+1}} \right)^{2\eta}}_{(ii)} \\ & \times \underbrace{\exp\left(m_{opt}(z-1)(1 - e^{-\beta t})\right)}_{(iii)} \underbrace{\left(1 + e^{-\beta(t+n\tau)}(z-1)\right)^{m_0}}_{(iv)}. \end{aligned} \quad (95)$$

In particular,

$$\mathbb{E}(m, t) = m_{opt} + e^{-\beta(t+n\tau)} (m_0 - m_{opt} + \eta(1 + (0; e^{\beta\tau})'_{n+1})). \quad (96)$$

It follows straightforwardly from the definition of the  $q$ -Pochhammer symbol that

$$(0; q)'_{n+1} \equiv \frac{q^{n+1} - 1}{q - 1} \quad (97)$$

$$(0; q)''_{n+1} \equiv q \frac{(q^n - 1)(q^{n+1} - 1)}{(q + 1)(q - 1)^2} \quad (98)$$

Using these results and setting  $t = \tau$  (at the end of a cell cycle), we obtain after some manipulation

$$\mathbb{E}(m, \tau) - m_{opt} = m_0 e^{-\beta\tau(n+1)} + \frac{\eta(1 - e^{-\beta n\tau}) + m_{opt}(e^{-\beta(n+1)\tau} + e^{-\beta n\tau})}{1 - e^{\beta\tau}} \quad (99)$$

and the only term retained in the  $n \rightarrow \infty$  limit is

$$\mathbb{E}(m, \tau) - m_{opt} \xrightarrow{n \rightarrow \infty} \frac{\eta}{1 - e^{\beta\tau}}. \quad (100)$$

### Different dynamic phases

We are concerned with the extension of the generating function for the birth-death process over  $n$  cell divisions with the same rate parameters  $\lambda, \nu$  to the case where we have different dynamic phases described by parameters  $\{\lambda_1, \nu_1\}, \{\lambda_2, \nu_2\}, \dots$ . The generating function for the birth-death process, without immigration, is the final term in Eqn. 67. We will write this expression in the form

$$G(z, t|m_0) = \left( \frac{Pz + Q}{Rz + S} \right)^{m_0}, \quad (101)$$

with coefficients

$$P = 2^n \lambda(l + l' - 2) - l^n l'(\lambda + \nu(l - 2)) \quad (102)$$

$$Q = l^n l'(\lambda + \nu(l - 2)) - 2^n(\lambda l' + \nu(l - 2)) \quad (103)$$

$$R = -\lambda l^n l'(l - 1) + 2^n \lambda(l + l' - 2) \quad (104)$$

$$S = 2\lambda l^n l'(l - 1) - 2^n l(\lambda l' + \nu(l - 2)). \quad (105)$$

If we now label these coefficients with an index  $r$  denoting the appropriate dynamic phase, so that, for example,  $P_r$  is Eqn. 102 with  $\lambda_r, \nu_r, n_r$  replacing  $\lambda, \nu, n$ , we can write:

$$h_{r_{max}} = \frac{P_{r_{max}} z + Q_{r_{max}}}{R_{r_{max}} z + S_{r_{max}}} \quad (106)$$

$$h_r = \frac{P_r h_{r+1} + Q_r}{R_r h_{r+1} + S_r} \quad (107)$$

$$g_{overall} = h_0 \equiv \frac{\tilde{P}_0 z + \tilde{Q}_0}{\tilde{R}_0 z + \tilde{S}_0}, \quad (108)$$

where  $\tilde{P}_r, \dots, \tilde{S}_r$  are given by the recurrence equations

$$\tilde{P}_r = P_r \tilde{P}_{r+1} + Q_r \tilde{R}_{r+1} \quad (109)$$

$$\tilde{Q}_r = Q_r \tilde{Q}_{r+1} + Q_r \tilde{S}_{r+1} \quad (110)$$

$$\tilde{R}_r = R_r \tilde{P}_{r+1} + S_r \tilde{R}_{r+1} \quad (111)$$

$$\tilde{S}_r = S_r \tilde{Q}_{r+1} + S_r \tilde{S}_{r+1}, \quad (112)$$

with  $\tilde{P}_n = P_n, \dots, \tilde{S}_n = S_n$ . If we write the matrix

$$\mathbf{M}_r = \begin{pmatrix} P_r & Q_r \\ R_r & S_r \end{pmatrix} \quad (113)$$

the general solutions to these equations can compactly be given by

$$\begin{pmatrix} \tilde{P}_0 & \tilde{Q}_0 \\ \tilde{R}_0 & \tilde{S}_0 \end{pmatrix} = \prod_{j=0}^{r_{max}} \mathbf{M}_j \quad (114)$$

### Birth-death-binomial extinction probabilities without balance and/or cell divisions

The birth-death-binomial generating function is given by setting  $\alpha = 0$  in Eqn. 67. We set  $\lambda = \kappa + \nu + \ln 2/\tau$  and only consider times immediately after cell divisions, hence setting  $t = 0$  and  $l' = 1$ , giving

$$G_{BD}(z, 0) = \left( \frac{2\nu(l_k - 1) + \tau^{-1}l_k^n(z-1)(\kappa\tau + \nu\tau(2l_k - 1) + \ln 2) + (1 + z - 2l_k z)(\kappa + \nu + \ln 2/\tau)}{2\nu(l_k - 1) + \tau^{-1}l_k^n(z-1)(2l_k - 1)(\kappa\tau + \nu\tau + \ln 2) + (1 + z - 2l_k z)(\kappa + \nu + \ln 2/\tau)} \right)^{m_0}, \quad (115)$$

where  $l_k \equiv e^{\kappa\tau}$ . Extinction probability is thus

$$P_{BD}(m = 0) = \left( \frac{(l_k^n - 1)(\kappa\tau + \nu\tau(2l_k - 1) + \ln 2)}{\kappa\tau(2l_k^{n+1} - l_k^n - 1) + \nu\tau(2l_k - 1)(l_k^n - 1) - \ln 2 - l_k^n \ln 2 + l_k^{n+1} \ln 4} \right)^{m_0} \quad (116)$$

which reduces to

$$P_{BD}(m = 0) = \left( \frac{1 - l_k^n}{1 + l_k^n - 2l_k^{n+1}} \right)^{m_0} \quad (117)$$

for  $\nu = 0$ , as given in the Main Text.

In the absence of cell divisions, the birth-death generating function is simply Eqn. 12 with  $\alpha = 0$ . Setting  $z = 0$  gives the general extinction probability

$$P_{BD'}(m = 0) = \left( \frac{\nu e^{(\lambda-\nu)t} - \nu}{\lambda e^{(\lambda-\nu)t} - \nu} \right)^{m_0}. \quad (118)$$

Copy number balance can be enforced in the absence of cell divisions by taking the  $\lambda = \nu$  limit, from which follows the generating function

$$G_{BD',H}(z, t) = \left( \frac{z + \nu t - \nu z t}{1 + \nu t - \nu z t} \right)^{m_0} \quad (119)$$

from which straightforwardly follows the extinction probability

$$P_{BD',H}(m = 0) = \left( \frac{\nu t}{1 + \nu t} \right)^{m_0} \quad (120)$$

### Other partitioning regimes

We have derived results for the case where a binomially-distributed random number of agents is lost at each cell division. We now consider the case where this number is a fixed constant. We will denote this constant loss number by  $\eta$ . In this case,

$$P_\delta(m_{i,a}|m_{i,b}) = \delta_{m_{i,a}, m_{i,b} - \eta}; \quad (121)$$

$$\sum_{m_{i,a}=0}^{m_{i,b}} \xi(z, t) [g(z, t)]^{m_{i,a}} P_\delta(m_{i,a}|m_{i,b})$$

$$= \xi(z, t) g(z, t)^{-\eta} g(z, t)^{m_{i,b}}; \quad (122)$$

$$\text{and so } \phi(z, t) = g(z, t)^{-\eta}; \quad (123)$$

$$\theta(g(z, t)) = g(z, t). \quad (124)$$

As  $\theta$ ,  $\xi$  and  $g$  take the same form as for the random loss case, the solutions for  $z_i$  and  $h_i$  are the same as before. The difference (due to the different form of  $\phi$ ) is in the second product in the general generating function form, which is now  $\prod_{i=1}^n g(z_i, \tau)^{-\eta}$ . By Eqn. 61 we have that this factor takes the form of Eqn. 52, with  $A_1 = \nu l(z-1)(-x_2)^n$ ,  $B_1 = B_2 = x_1^n(\nu - \lambda z)$ ,  $A_2 = \lambda l(z-1)(-x_2)^n$ ,  $\rho_A = x_1$ ,  $\rho_B = (-x_2)$ ,  $\gamma = -\eta$ .

The generating function in the case of deterministic subtractive inheritance involves (i) Eqn. 52 applied to the appropriate terms described in Eqn. 54; (ii) Eqn. 52 applied to Eqn. 61 as described; (iii) Eqn. 66; and (iv)  $h_0$  from Eqn. 32, and is

$$\begin{aligned}
G_n(z, t) &= \left( \frac{(\lambda l'(z-1)(-x_2)^n + x_1^n(\nu - \lambda z)) \left( \frac{-\nu l'(z-1)(-x_2)^n}{x_1^n(\nu - \lambda z)}; \frac{x_1}{-x_2} \right)_{n+1}}{(\nu l'(z-1)(-x_2)^n + x_1^n(\nu - \lambda z)) \left( \frac{-\lambda l'(z-1)(-x_2)^n}{x_1^n(\nu - \lambda z)}; \frac{x_1}{-x_2} \right)_{n+1}} \right)^{-\eta} \\
&\times \left( \frac{(\lambda l' l(z-1) + l(\nu - \lambda z)) \left( \frac{-\lambda l'(z-1)}{l(\nu - \lambda z)}; l \right)_{n+1}}{(\lambda l'(z-1) + l(\nu - \lambda z)) \left( \frac{-\lambda l' l(z-1)}{l(\nu - \lambda z)}; l \right)_{n+1}} \right)^{\alpha/\lambda} \\
&\times \left( \frac{\nu - \lambda}{\lambda l(z-1) - \lambda z + \nu} \right)^{\alpha/\lambda} \left( \frac{l^n l' \nu(z-1) + \nu - \lambda z}{l^n l' \lambda(z-1) + \nu - \lambda z} \right)^{m_0} \tag{125}
\end{aligned}$$

Now we briefly explore two other inheritance regimes of potential biological applicability. In these cases we have not been able to obtain closed-form solutions for an arbitrarily large number of cell divisions: however, the appropriate recursion relations may be followed for as many divisions as required in order to obtain a closed-form solution for the generating function.

First we consider deterministic partitioning of agents, where each daughter inherits exactly half of a parent's population. In this case:

$$P_\delta(m_{i,a}|m_{i,b}) = \delta_{m_{i,a}, m_{i,b}/2}; \tag{126}$$

$$\begin{aligned}
&\sum_{m_{i,a}=0}^{m_{i,b}} \xi(z, t) [g(z, t)]^{m_{i,a}} P_\delta(m_{i,a}|m_{i,b}) \\
&= \xi(z, t) g(z, t)^{m_{i,b}/2}; \tag{127}
\end{aligned}$$

$$\text{and so } \phi(z, t) = 1; \tag{128}$$

$$\theta(g(z, t)) = \sqrt{g(z, t)}, \tag{129}$$

leading to the recurrence relations

$$z_i = \sqrt{g(z_{i-1}, \tau)}; z_1 = \sqrt{g(z, t)}. \tag{130}$$

$$h_i = g(\sqrt{h_{i+1}}, \tau); h_n = g(z, t). \tag{131}$$

Next we consider the binomial inheritance of clusters of agents. We will assume that these clusters are of fixed size  $n_c$ . In this case, we consider the new variables  $C_b = m_{i,b}/n_c$ ,  $C_a = m_{i,a}/n_c$  (denoting the number of clusters before and after a cell division), and write

$$\begin{aligned}
&\sum_{m_{i,b}=0}^{\infty} \sum_{m_{i,a}=0}^{m_{i,b}} g^{m_{i,a}} P_\delta(m_{i,a}|m_{i,b}) P_{i-1}(m_{i,b}, \tau | m_0) \\
&= \sum_{C_b=0}^{\infty} \sum_{C_a=0}^{C_b} g^{n_c C_a} \binom{C_b}{C_a} 2^{-C_b} P_{i-1}(n_c C_b, \tau | m_0) \tag{132}
\end{aligned}$$

$$= \sum_{C_b=0}^{\infty} \left( \frac{1}{2} + \frac{g^{n_c}}{2} \right)^{C_b} P_{i-1}(n_c C_b, \tau | m_0) \tag{133}$$

$$= \sum_{m_{i,b}=0}^{\infty} \left( \frac{1}{2} + \frac{g^{n_c}}{2} \right)^{\frac{m_{i,b}}{n_c}} P_{i-1}(m_{i,b}, \tau | m_0) \tag{134}$$

The resultant generating function analysis yields a very similar outcome to those previously considered, with the altered recurrence relation

$$z_i = \left( \frac{1}{2} + \frac{g(z_{i-1}, \tau)^{n_c}}{2} \right)^{\frac{1}{n_c}} ; z_1 = \left( \frac{1}{2} + \frac{g(z, t)^{n_c}}{2} \right)^{\frac{1}{n_c}} \quad (135)$$

$$h_i = g_0 \left( \left( \frac{1}{2} + \frac{h_{i+1}^{n_c}}{2} \right)^{\frac{1}{n_c}}, \tau \right) ; h_n = g_0(z, t). \quad (136)$$

We have been unable to reduce the recurrence relations Eqns. 130-131 or Eqns. 135-136 to a closed-form solution for birth-death dynamics, but the corresponding problems may be solved for an arbitrary number of cell divisions by writing out the recurrence explicitly, thereby obtaining the generating function for a given number of cell divisions. The figure in the main text uses this approach.

---

[1] L. Brand. A sequence defined by a difference equation. *Am. Math. Mon.*, 62(7):489, 1955.
